# Supplementary material for: Bioactive Compounds from P. pertomentellum That Regulate QS, Biofilm Formation and Virulence Factor Production of P. aeruginosa
Source: MDPI journal article supplement (doi:10.3390/molecules28176181), 2023-08-22
Supplement: s1 [file s1]

## Supplementary material

# Bioactive Compounds from *P. pertomentellum* That Regulate QS, Biofilm Formation and Virulence Factor Production of *P. aeruginosa*

Lida V. Hernández-Moreno <sup>1</sup>, Ludy C. Pabón-Baquero <sup>2</sup>, Juliet A. Prieto-Rodriguez <sup>3,\*</sup> and Oscar J. Patiño-Ladino <sup>1</sup>

<sup>1</sup> Departamento de Química, Facultad de Ciencias, Universidad Nacional de Colombia, Sede Bogotá, Bogotá 111321, Colombia; [lhernandezmo@unal.edu.co](mailto:lhernandezmo@unal.edu.co)

<sup>2</sup> Escuela de Ciencias Básicas y Aplicadas, Universidad de La Salle, Bogotá 111711, Colombia; [lupabon@unisalle.edu.co](mailto:lupabon@unisalle.edu.co)

<sup>3</sup> Departamento de Química, Facultad de Ciencias, Pontificia Universidad Javeriana, Bogotá 110231, Colombia; [juliet.prieto@javeriana.edu.co](mailto:juliet.prieto@javeriana.edu.co)

\* Correspondence: [juliet.prieto@javeriana.edu.co](mailto:juliet.prieto@javeriana.edu.co); Tel.: +57-6013208320 (ext. 4124)

### Table of contents

1. Phytochemical study carried out on aerial part from *P. pertomentellum*.  
**Scheme S1.** Isolation scheme of compounds **1** to **5** from *P. pertomentellum*.
2. Growth, formation biofilm of *P. aeruginosa* and violacein production of *C. violaceum* in the presence of extract and fractions of *P. pertomentellum*.  
  
**Table 1.** Percentage growth, formation biofilm of *P. aeruginosa* and violacein production of *C. violaceum* in the presence of extract and fractions of *P. pertomentellum*.
3. NMR spectra from phytochemistry isolation compounds  
**Figure S1.** IR spectra of ethyltembamide (**1**).  
**Figure S2.** <sup>1</sup>H-NMR spectra of ethyltembamide (**1**).  
**Figure S3.** APT spectra of ethyltembamide (**1**).  
**Figure S4.** COSY spectra of ethyltembamide (**1**).  
**Figure S5.** HMQC spectra of ethyltembamide (**1**).  
**Figure S6.** HMBC spectra of ethyltembamide (**1**).  
**Figure S7.** <sup>1</sup>H-NMR spectra of tembamide acetate (**2**).  
**Figure S8.** APT spectra of tembamide acetate (**2**).  
**Figure S9.** <sup>1</sup>H-NMR spectra of cepharadione B (**3**).  
**Figure S10.** APT spectra of cepharadione B (**3**).  
**Figure S11.** <sup>1</sup>H-NMR spectra of benzamide (**4**).  
**Figure S12.** APT spectra of benzamide (**4**).  
**Figure S13.** <sup>1</sup>H-NMR spectra of tembamide (**5**).  
**Figure S14.** APT spectra of tembamide (**5**).  
  
4. Effect of compounds of *P. pertomentellum* against growth, biofilm formation and virulence factors production of *P. aeruginosa*  
**Table 2.** Percentage growth of *P. aeruginosa* on exposure to compounds isolated from *P. pertomentellum*.

**Table 3.** Percentage biofilm formation and virulence factors production of *P. aeruginosa* on exposure to compounds isolated from *P. pertomentellum*.

1. Isolation compound.

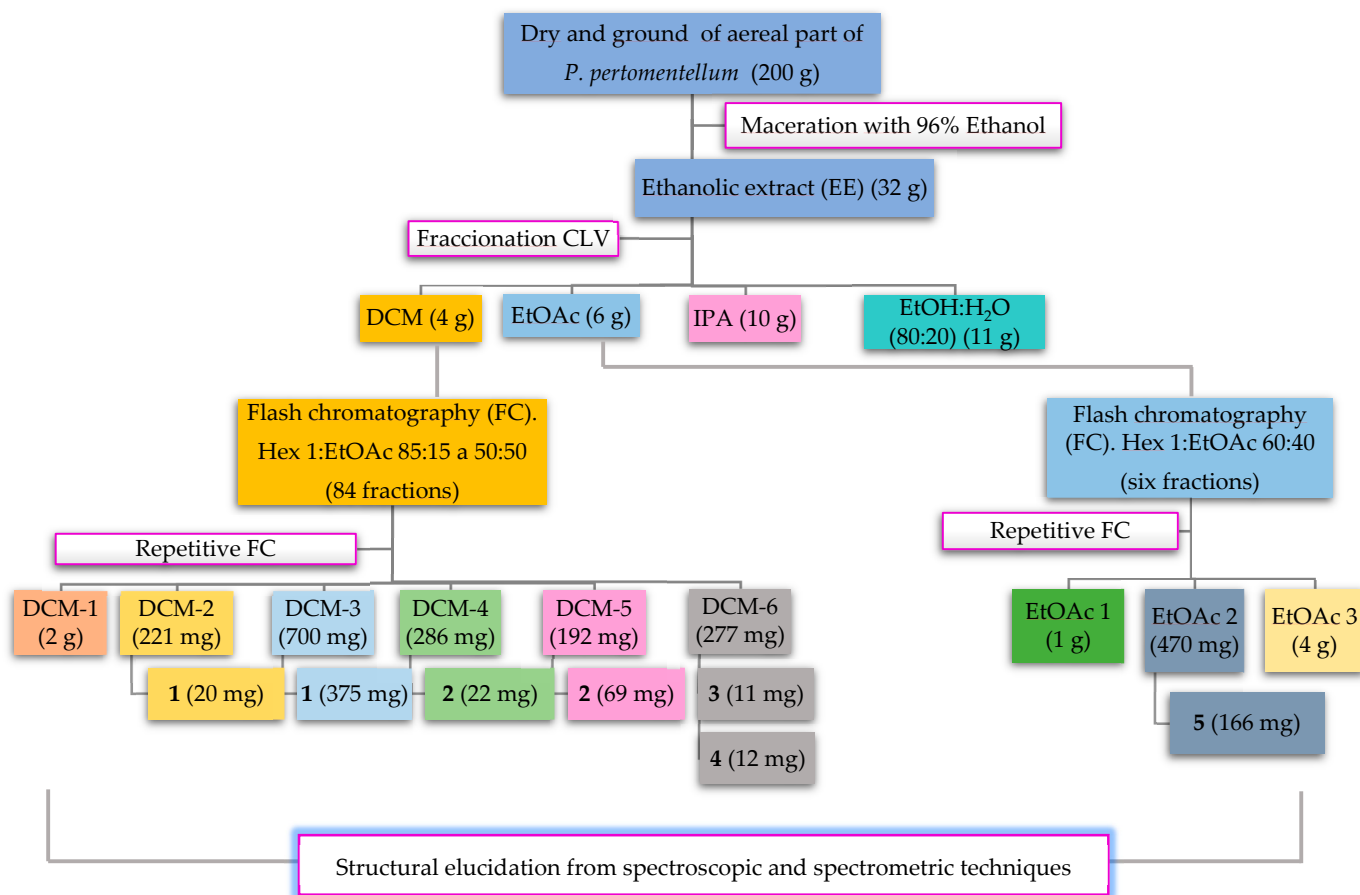

**Scheme S1.** Isolation scheme of compounds 1 to 5 from *P. pertomentellum*.

**Table S1.** Percentage growth, formation biofilm of *P. aeruginosa* and violacein production of *C. violaceum* in the presence of extract and fractions of *P. pertomentellum*.

| Treatment             | Concentrations $\mu\text{g/mL}$ |                     |                    |                    |                     |                     |                     |                     |                     |                    |                     |                     |                    |                     |                     |
|-----------------------|---------------------------------|---------------------|--------------------|--------------------|---------------------|---------------------|---------------------|---------------------|---------------------|--------------------|---------------------|---------------------|--------------------|---------------------|---------------------|
|                       | 1000                            |                     |                    | 250                |                     |                     | 62.5                |                     |                     | 15.6               |                     |                     | 3.9                |                     |                     |
|                       | S                               | B                   | V                  | S                  | B                   | V                   | S                   | B                   | V                   | S                  | B                   | V                   | S                  | B                   | V                   |
| EE                    | 129.1<br>$\pm 9.8$              | 139.4<br>$\pm 19.2$ | 9.6 $\pm$ 2.6      | 132.2<br>$\pm 1.3$ | 83.4<br>$\pm 3.5$   | 43.8<br>$\pm 4.4$   | 122.1<br>$\pm 6.6$  | 93.5<br>$\pm 8.6$   | 63.9<br>$\pm 3.9$   | 115.2<br>$\pm 4.1$ | 77.5<br>$\pm 9.2$   | 72.4<br>$\pm 1.7$   | 118.5<br>$\pm 1.5$ | 72.2<br>$\pm 17.4$  | 81.2<br>$\pm 2.5$   |
| DCM                   | 79.1<br>$\pm 1.8^*$             | 92.9<br>$\pm 7.4$   | 10.8<br>$\pm 1.2$  | 86.6<br>$\pm 2.6$  | 90.1<br>$\pm 9.9$   | 44.5<br>$\pm 8.4$   | 95.6<br>$\pm 3.7$   | 98.0<br>$\pm 13.8$  | 57.6<br>$\pm 3.7$   | 101.4<br>$\pm 2.2$ | 92.4<br>$\pm 8.4$   | 66.9<br>$\pm 3.3$   | 99.8<br>$\pm 2.9$  | 98.5<br>$\pm 18.1$  | 86.6<br>$\pm 12.5$  |
| AcOEt                 | 100.7<br>$\pm 2.7$              | 124.3<br>$\pm 12.6$ | 8.9 $\pm$ 1.1      | 103.1<br>$\pm 1.5$ | 111.9<br>$\pm 5.1$  | 87.5<br>$\pm 10.2$  | 107.1<br>$\pm 1.3$  | 101.8<br>$\pm 2.6$  | 90.6<br>$\pm 15.7$  | 100.1<br>$\pm 3.2$ | 95.2<br>$\pm 16.8$  | 100.5<br>$\pm 7.4$  | 109 $\pm$ 2.4      | 84.1<br>$\pm 15.8$  | 97.5<br>$\pm 13.5$  |
| IPA                   | 100.8<br>$\pm 3.4$              | 110.2<br>$\pm 11.0$ | 91.9<br>$\pm 16.7$ | 101.1<br>$\pm 2.7$ | 131.2<br>$\pm 16.8$ | 138.6<br>$\pm 19.2$ | 110.7<br>$\pm 1.3$  | 133.8<br>$\pm 12.2$ | 130.2<br>$\pm 15.7$ | 113.5<br>$\pm 1.7$ | 135.2<br>$\pm 14.5$ | 103.4<br>$\pm 16.3$ | 111.6<br>$\pm 1.4$ | 108.4<br>$\pm 4.5$  | 116.5<br>$\pm 13.2$ |
| EtOH:H <sub>2</sub> O | 107.8<br>$\pm 4.2$              | 162.4<br>$\pm 7.0$  | 49.6<br>$\pm 5.1$  | 108.5<br>$\pm 1.7$ | 172.7<br>$\pm 19.1$ | 51.3<br>$\pm 8.0$   | 105.5<br>$\pm 12.1$ | 171.8<br>$\pm 17.7$ | 54.3<br>$\pm 11.8$  | 103.2<br>$\pm 2.4$ | 131.7<br>$\pm 11.9$ | 58.3<br>$\pm 10.4$  | 101.5<br>$\pm 1.6$ | 104.3<br>$\pm 10.7$ | 63.7<br>$\pm 18.9$  |

S: growth, B: formation biofilm, V: violaceum production. Data are represented the mean  $\pm$  standard deviation of five independent replicates.

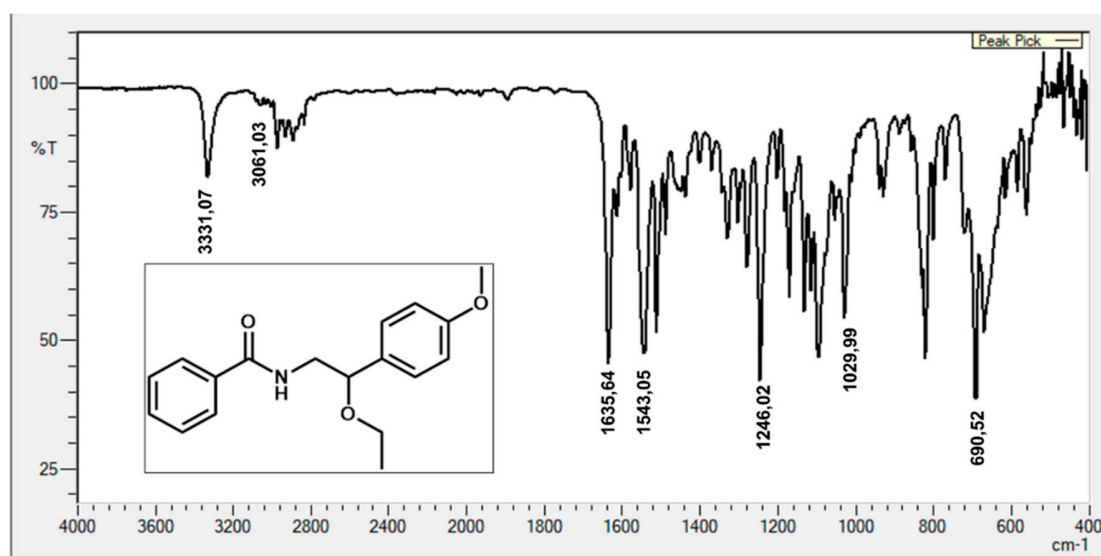

**Figure S1.** IR spectra of ethyltembamide (1).

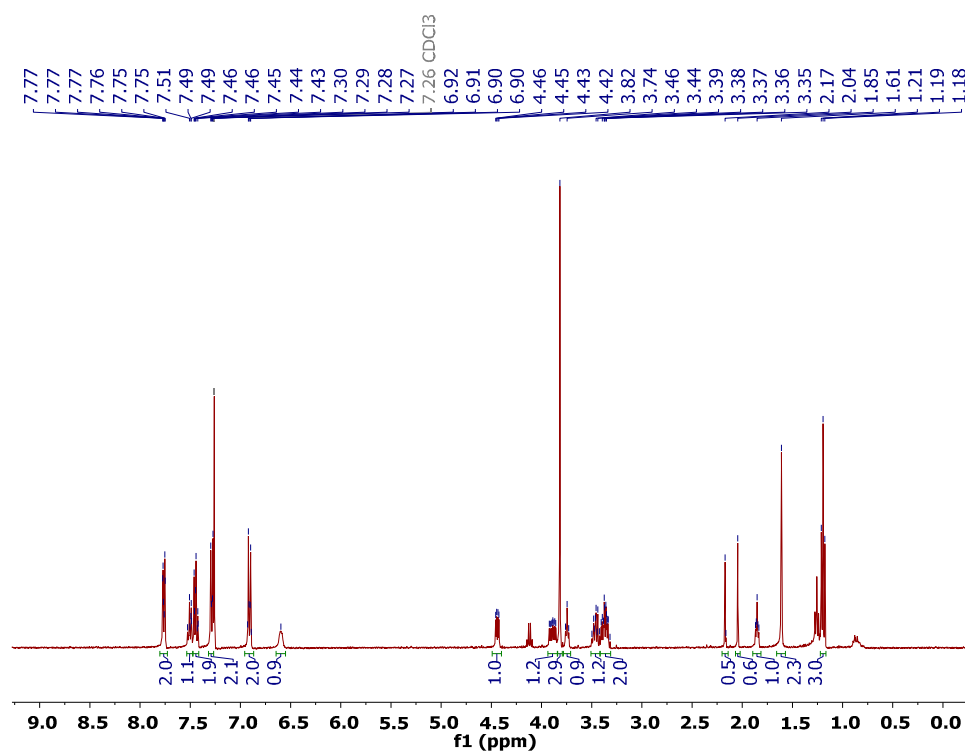

Figure S2. <sup>1</sup>H-NMR spectra of ethyltembamide (1).

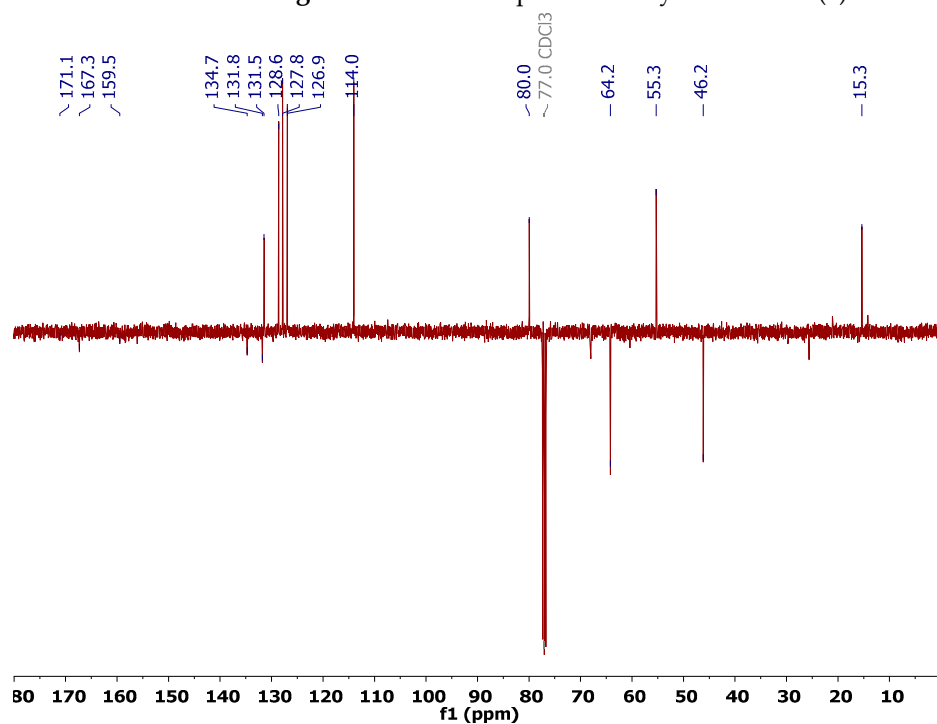

Figure S3. APT spectra of ethyltembamide (1).

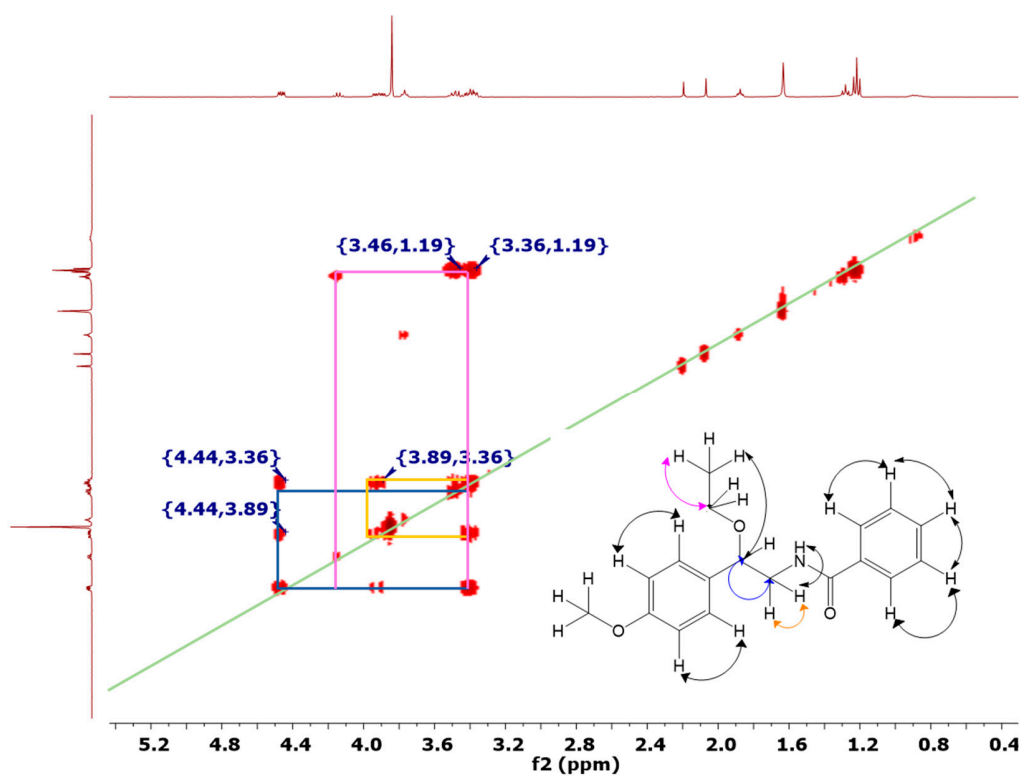

Figure S4. COSY spectra of ethyltembamide (1).

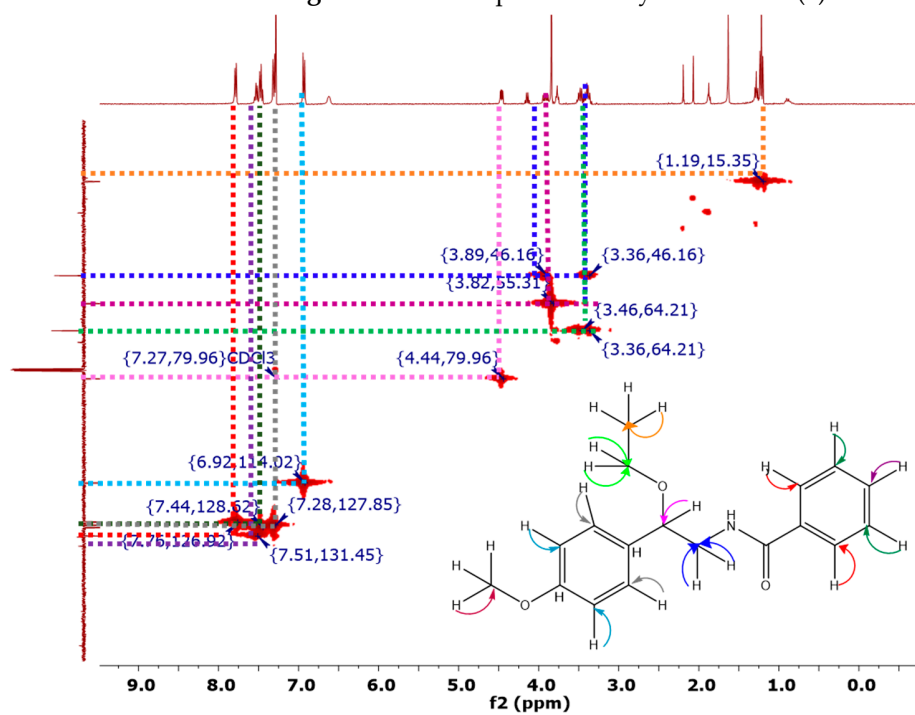

Figure S5. HMQC spectra of ethyltembamide (1).

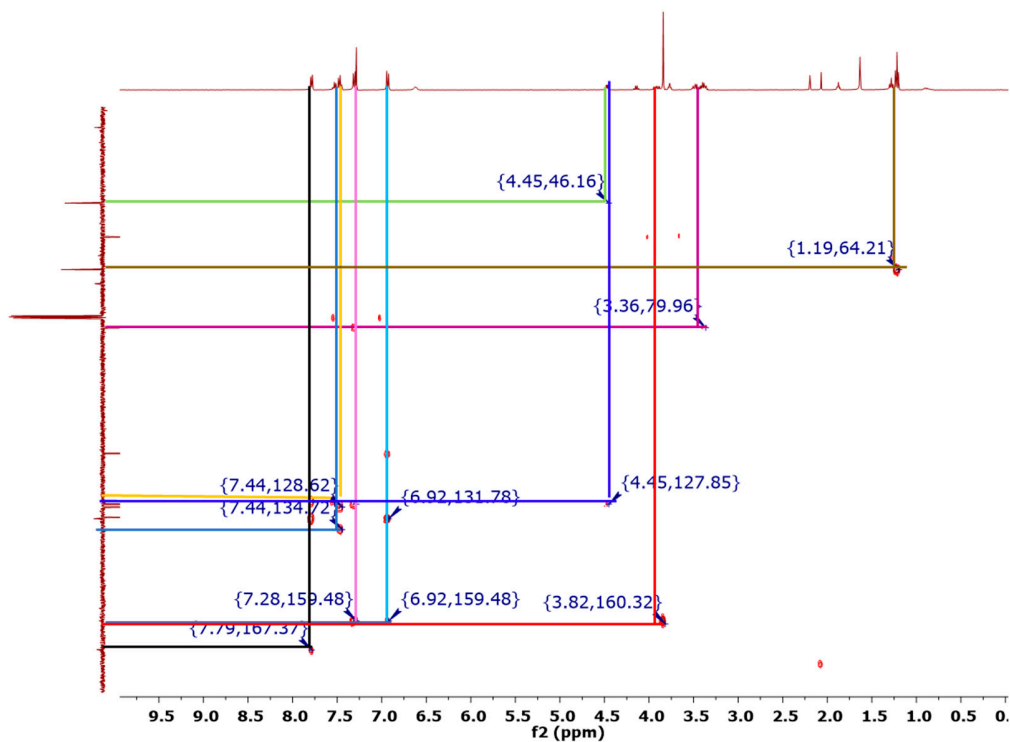

Figure S6. HMBC spectra of ethyltembamide (1).

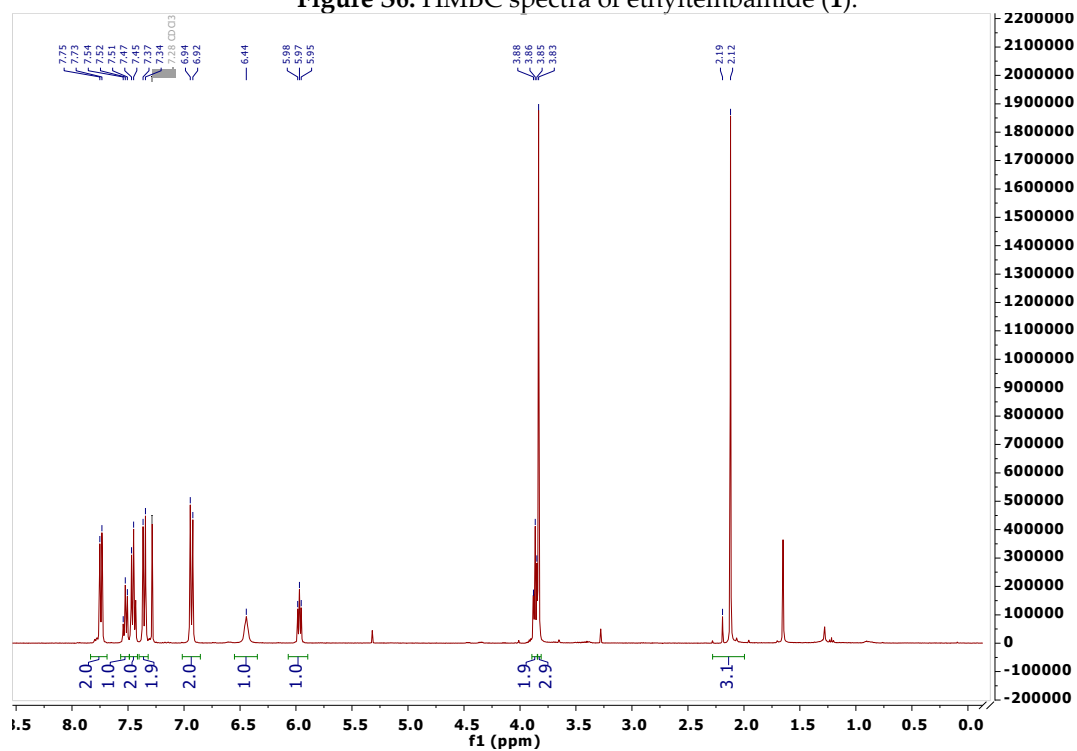

Figure S7.  $^1\text{H}$ -NMR spectra of tembamide acetate (2).

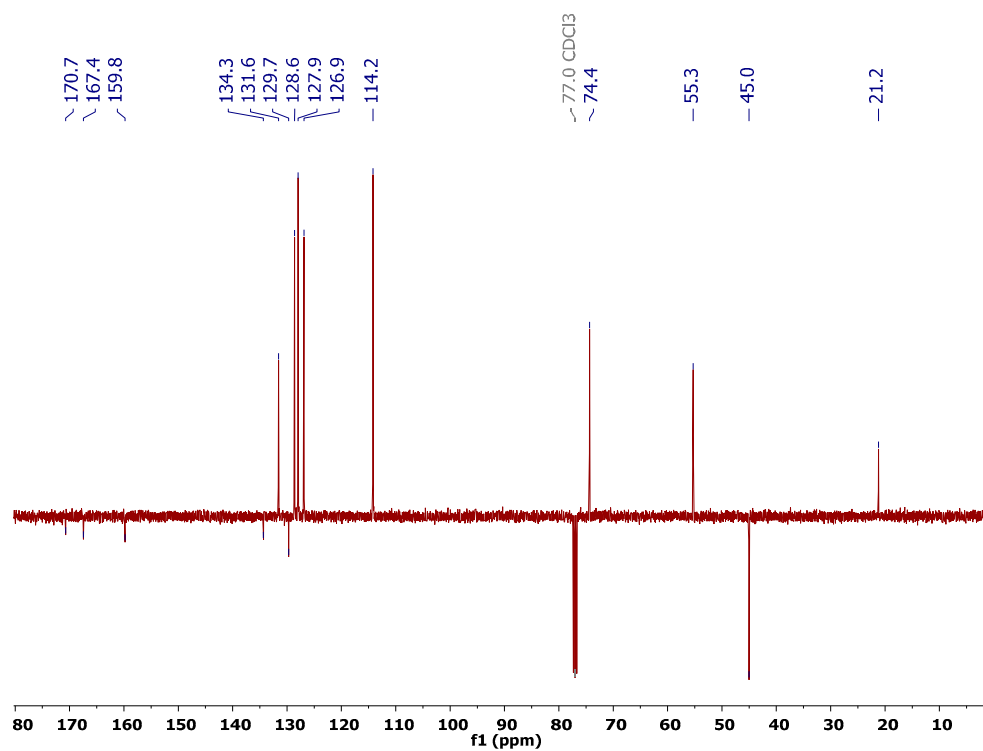

Figure S8. APT spectra of tembamide acetate (2).

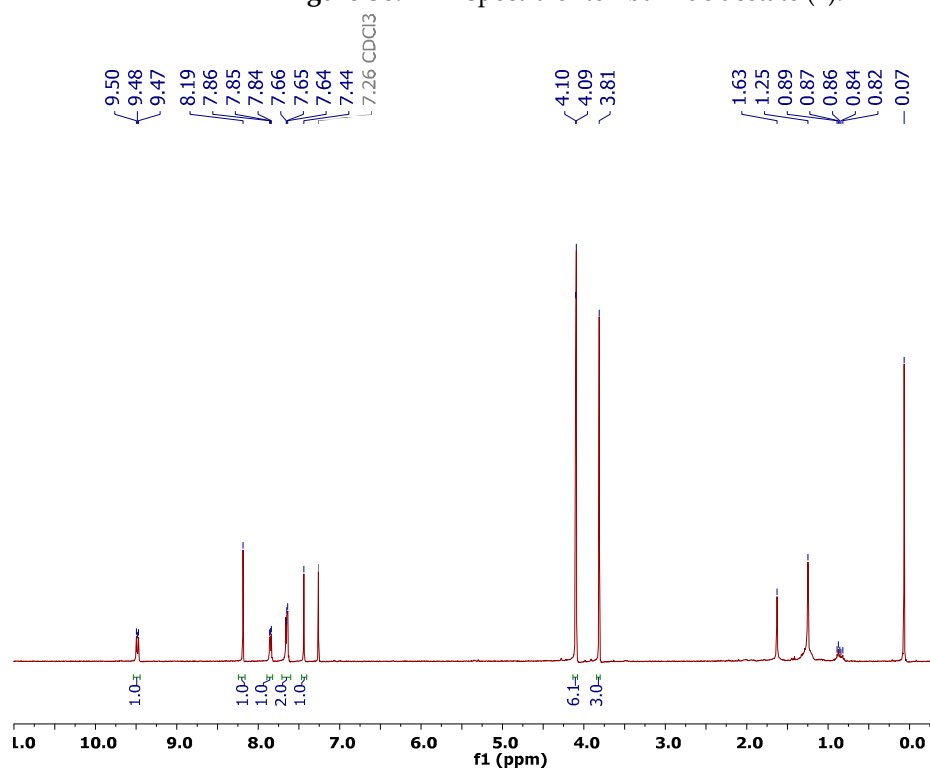

Figure S9. <sup>1</sup>H-NMR spectra of cepharadione B (3).



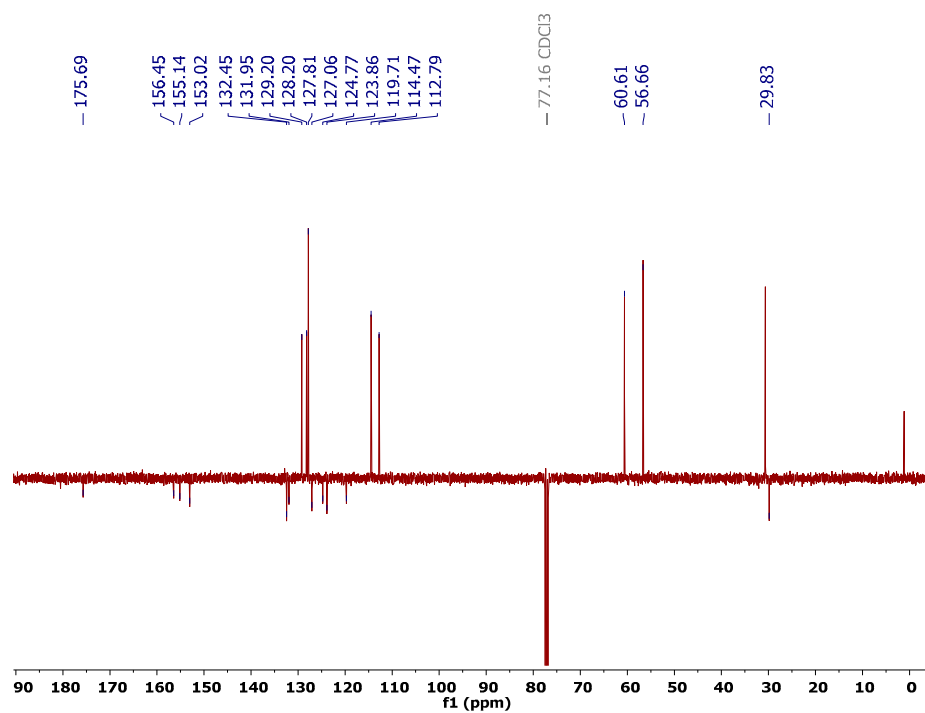

Figure S10. APT spectra of cepharadione B (3).

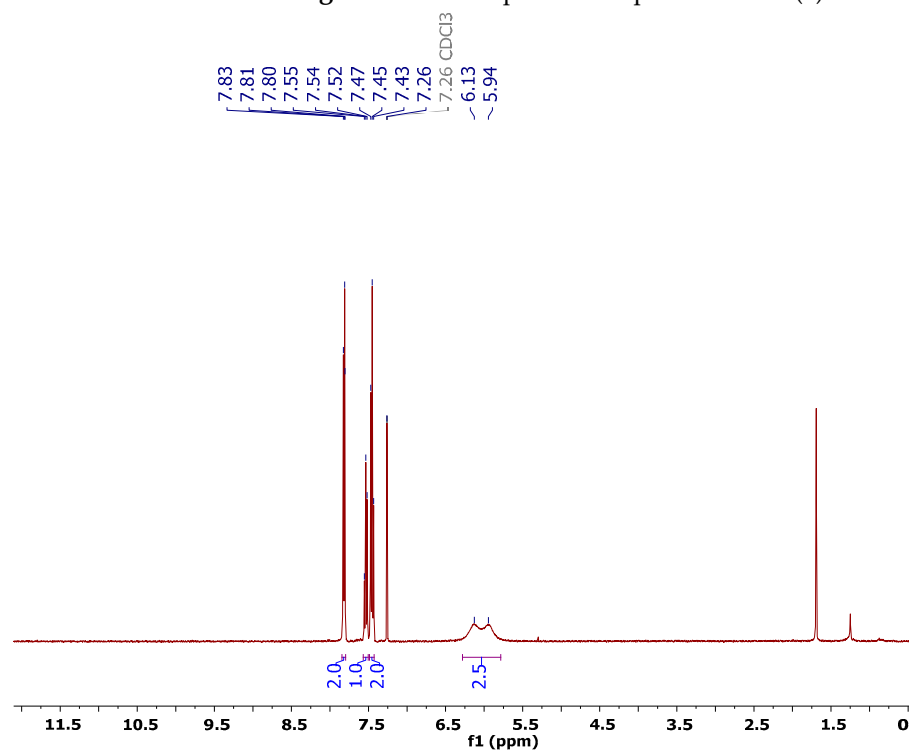

Figure S11. <sup>1</sup>H-NMR spectra of benzamide (4).

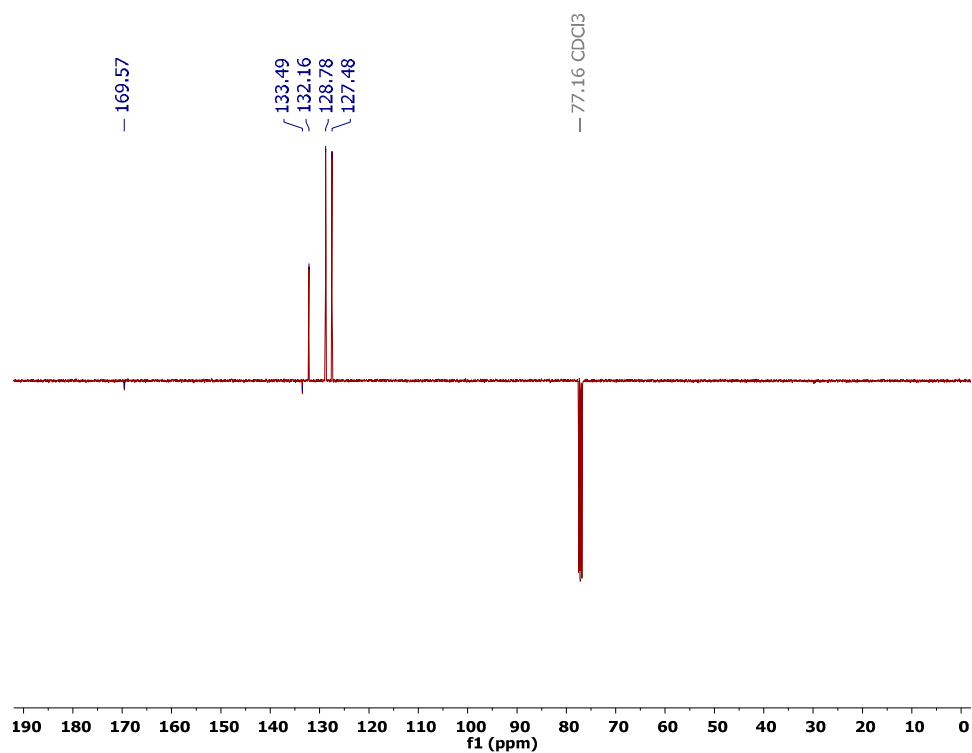

Figure S12. APT spectra of benzamide (4).

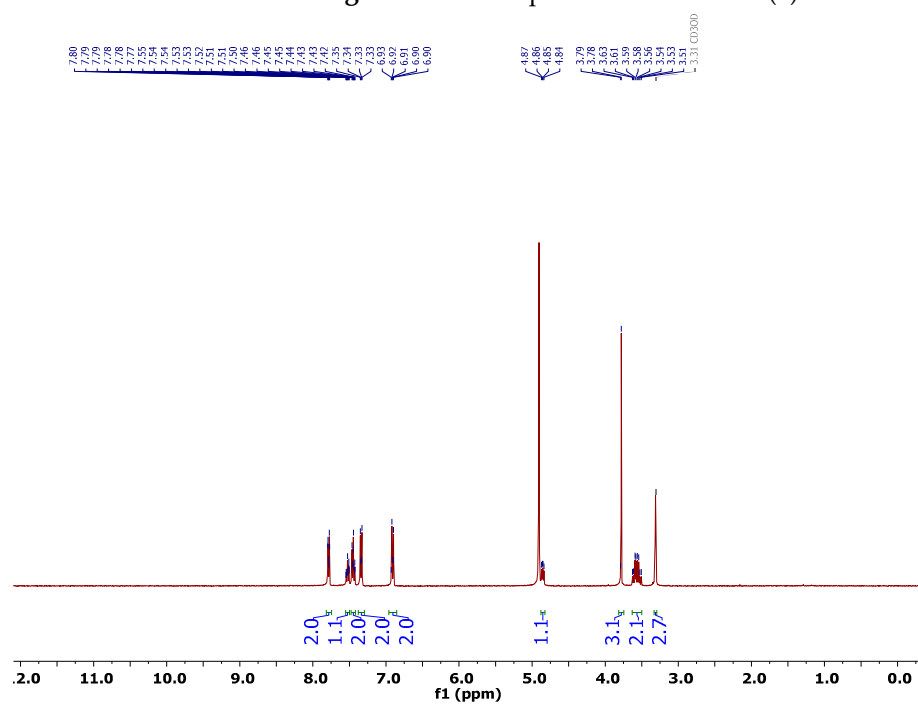

Figure S13. <sup>1</sup>H-NMR spectra of tembamide (5).

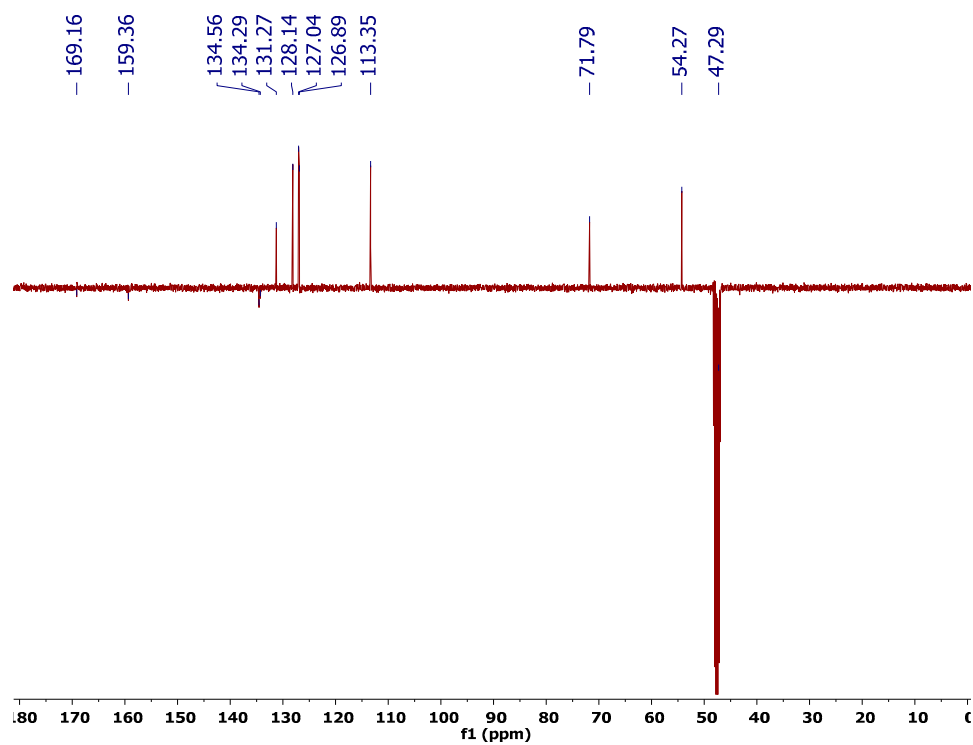

Figure S14. APT spectra of tembamide (5).

Table S2. Percentage growth of *P. aeruginosa* on exposure to compounds isolated from *P. pertomentellum*.

| Compound                          | Concentrations $\mu\text{g/mL}$ |                |                |                 |
|-----------------------------------|---------------------------------|----------------|----------------|-----------------|
|                                   | 250                             | 125            | 62.5           | 31.2            |
| 1                                 | $107.5 \pm 2.5$                 | $95.8 \pm 3.4$ | $94.9 \pm 5.6$ | $101.1 \pm 1.8$ |
| 2                                 | $88.7 \pm 3.2$                  | $88.9 \pm 3.6$ | $86.7 \pm 0.9$ | $101.3 \pm 2.3$ |
| 3                                 | $88 \pm 1.4$                    | $84.5 \pm 2.7$ | $87.4 \pm 1.5$ | $101.1 \pm 1.8$ |
| 4                                 | $87.5 \pm 7.3$                  | $82.9 \pm 4.2$ | $84.8 \pm 3.7$ | $91 \pm 5.7$    |
| 5                                 | $91.2 \pm 9.9$                  | $83.9 \pm 3.9$ | $82.4 \pm 4.3$ | $91 \pm 5.7$    |
| Gentamicine( 2 $\mu\text{g/mL}$ ) | $2.1 \pm 1.3$                   |                |                |                 |

Table S3. Percentage biofilm formation and virulence factors production of *P. aeruginosa* on exposure to compounds isolated from *P. pertomentellum*.

| Compound | Bioassay   | Concentrations $\mu\text{g/mL}$ |                   |                   |                   |
|----------|------------|---------------------------------|-------------------|-------------------|-------------------|
|          |            | 250                             | 125               | 62.5              | 31.2              |
| 1        | Biofilm    | $63.3 \pm 18.9^*$               | $71.8 \pm 10.4^*$ | $72.9 \pm 21.3^*$ | $56.4 \pm 12.7^*$ |
|          | Piociarina | $67.1 \pm 32.29^*$              | $77.9 \pm 61.0^*$ | $71.2 \pm 33.7^*$ | $125.2 \pm 16.1$  |
|          | Proteasas  | $81.7 \pm 23.7$                 | $76.7 \pm 27.1^*$ | $89.1 \pm 21.4$   | $100.3 \pm 20.1$  |
|          | Elastasas  | $49.4 \pm 15.7^*$               | $48.8 \pm 21.9^*$ | $55.1 \pm 14.7^*$ | $66.0 \pm 12.1^*$ |
| 2        | Biofilm    | $93.1 \pm 8.3$                  | $53.4 \pm 3.6^*$  | $64.3 \pm 10.2^*$ | $66.6 \pm 4.3^*$  |

|          |                   |              |              |              |              |
|----------|-------------------|--------------|--------------|--------------|--------------|
|          | <b>Piocianina</b> | 68.4 ± 14.4* | 77.3 ± 12.2  | 94.2 ± 13.1  | 110.8 ± 13.1 |
|          | <b>Proteasas</b>  | 94.3 ± 8.3   | 98.9 ± 4.8   | 83.2 ± 19.8  | 85.8 ± 20.4  |
|          | <b>Elastasas</b>  | 91.9 ± 19.6  | 66.8 ± 18.1* | 60.1 ± 9.9*  | 62.7 ± 7.4*  |
| <b>3</b> | <b>Biofilm</b>    | 44.2 ± 7.9*  | 45.4 ± 4.9*  | 46.7 ± 13.6* | 41.5 ± 8.9*  |
|          | <b>Piocianina</b> | 34.6 ± 2.5*  | 59.3 ± 17.2* | 47.9 ± 13.7* | 102.1 ± 16.1 |
|          | <b>Proteasas</b>  | 77.1 ± 6.1*  | 86.9 ± 7.1   | 79.9 ± 15.6  | 81.1 ± 8.7   |
|          | <b>Elastasas</b>  | 58.8 ± 9.2*  | 80.7 ± 15.3  | 57.1 ± 12.7* | 63.8 ± 11.5* |
| <b>4</b> | <b>Biofilm</b>    | 135.9 ± 36.8 | 102.4 ± 17.7 | 35.6 ± 4.9*  | 34.2 ± 3.1*  |
|          | <b>Piocianina</b> | 93.5 ± 9.9   | 76.9 ± 20.8  | 79.2 ± 10.6  | 55.6 ± 14.1* |
|          | <b>Proteasas</b>  | 91.2 ± 12.4  | 89.1 ± 7.5   | 89.5 ± 10.6  | 83.9 ± 6.3   |
|          | <b>Elastasas</b>  | 84.8 ± 19.9  | 74.1 ± 13.3* | 69.1 ± 18.4* | 68.3 ± 20.1* |
| <b>5</b> | <b>Biofilm</b>    | 41.2 ± 6.9*  | 59.1 ± 8.7*  | 66.1 ± 13.6* | 81.9 ± 18.1  |
|          | <b>Piocianina</b> | 71.7 ± 15.4* | 78.8 ± 22.6  | 108.1 ± 12.9 | 82.1 ± 19.6  |
|          | <b>Proteasas</b>  | 81.3 ± 15.8  | 95.5 ± 11.3  | 103.9 ± 2.4  | 95.6 ± 8.5   |
|          | <b>Elastasas</b>  | 68.7 ± 19.1* | 87.1 ± 15.7  | 88.2 ± 5.3   | 82.7 ± 14.1  |

Data are represented the mean ± standard deviation of five independent replicates. \*Indicate a significant difference according to Duncan's test (p < 0.05).
